# Supplementary material for: Urbanization, environmental stabilization and temporal persistence of bird species: a view from Latin America
Source: PeerJ journal article supplement (doi:10.7717/peerj.6056), 2018-12-06
Supplement: Term_search.pdf [file Term_search.pdf]

| Term search                                                               | Number of papers scanned | Number of papers selected |
|---------------------------------------------------------------------------|--------------------------|---------------------------|
| urban* AND arthropod* AND seasonal; urban* AND insect* AND seasonal       | 1049                     | 19                        |
| urban* AND arthropod* AND nocturnal; urban* AND insect* AND nocturnal     | 631                      | 6                         |
| urban* AND arthropod* AND interannual; urban* AND insect* AND interannual | 607                      | 1                         |
| urban* AND artificial light                                               | 920                      | 14                        |
| urban* AND fruit* AND interannual                                         | 301                      | 0                         |
| urban* AND fruit* AND seasonal                                            | 415                      | 2                         |
| urban* AND NDVI AND interannual                                           | 313                      | 2                         |
| urban* AND NDVI AND seasonal                                              | 312                      | 11                        |
| urban* AND land surface temperature AND interannual                       | 315                      | 1                         |
| urban* AND land surface temperature AND seasonal                          | 582                      | 24                        |
| urban* AND vegetation AND interannual                                     | 304                      | 2                         |
| urban* AND vegetation AND seasonal                                        | 337                      | 7                         |
| urban* AND bird* AND interannual                                          | 308                      | 8                         |
| urban* AND bird* AND seasonal                                             | 563                      | 4                         |
| urban* AND bird* AND nocturnal                                            | 336                      | 18                        |
